# Supplementary material
Source: PubMed Central journal article supplement (PMC3093760)
Supplement: NIHMS183273-supplement-Supplementary.pdf [file NIHMS183273-supplement-Supplementary.pdf]

**Table S1. Difference in neural tube, mz and vz size in E11.5 neural tubes from multiple sections from *Cux2* transgenic and *Cux2<sup>neo/neo</sup>* mutants relative to control littermates**

|                                                                  | VZ size | MZ size | Total NT size | NT height | NT width |
|------------------------------------------------------------------|---------|---------|---------------|-----------|----------|
| Control versus <i>Cux2</i> transgenic (% difference; n=7)        | 108%    | 114%    | 111%          | 107%      | 110%     |
| Control versus <i>Cux2<sup>neo/neo</sup></i> (% difference; n=7) | 87%*    | 51%*    | 72.2%*        | 98%       | 79.3%*   |

VZ, ventricular zone; MZ, marginal zone; NT, neural tube.  
\*Statistical significance ( $P < 0.05$ ) by Student's *t*-test.

**Table S2. Effect of *Cux2* loss- and gain-of-function on neuronal cell fate in the spinal cord**

|                                        | Control E10.5                              | <i>Cux2<sup>neo/neo</sup></i> mutants E10.5 | <i>Cux2</i> Tg E10.5                               |
|----------------------------------------|--------------------------------------------|---------------------------------------------|----------------------------------------------------|
| Isl1                                   | 67.12±14.6*                                | 88.7±14.5                                   | 53.7±16.1                                          |
| P value ( <i>t</i> -test) <sup>†</sup> |                                            | 0.000003                                    | 0.053                                              |
| Lhx1                                   | 101.1±21.2                                 | 85.2±30.7                                   | 144.6±38.1                                         |
| P value ( <i>t</i> -test)              |                                            | 0.0007                                      | 0.0058                                             |
|                                        | <i>Cux2<sup>neo/neo</sup></i> /Control (%) | <i>Cux2</i> Tg/Control (%)                  | <i>Cux2<sup>neo/neo</sup></i> / <i>Cux2</i> Tg (%) |
| Isl1                                   | 32                                         | -20 <sup>‡</sup>                            | 61                                                 |
| P value ( <i>t</i> -test)              |                                            |                                             | 0.000002                                           |
| Lhx1                                   | -16                                        | 43                                          | -70                                                |
| P value ( <i>t</i> -test)              |                                            |                                             | 0.0007                                             |

*Cux2<sup>neo/neo</sup>* mutants display increased numbers of Isl1-positive cells and decreased Lhx1 numbers in the ventral neural tube at E10.5, relative to control littermates. *Cux2* transgenics (Tg), however, display decreased numbers of Isl1-positive cells and increased numbers of Lhx1-positive cells relative to control embryos in E10.5 ventral neural tubes.

\*Figures are represented as average values±s.d.

<sup>†</sup>P values were determined using a one-tailed Student's *t*-test with two samples, unequal variance.

<sup>‡</sup>Negative sign denotes decrease.

**Supplementary Figure S1.** *Cux2* and  $P27^{Kip1}$  protein levels in the developing spinal cord at E11.5. (A-C) *Cux2* levels (A),  $P27^{Kip1}$  levels (B), and the merged image of *Cux2* / $P27^{Kip1}$  (yellow; C) in transverse sections of the ventral neural tube at the forelimb bud level of E11.5 embryos. (A) Little or no *Cux2* levels were detected in the motor neuron domain in ventro-lateral mz. (C) *Cux2* and  $P27^{Kip1}$  are co-expressed in the iz and fp, but not in post-mitotic motor neurons in the mz, which expresses  $p27^{Kip1}$  (red) but not *Cux2* (green). Abbreviations: cn, commissural neurons; fp, floorplate; iz, intermediate zone; mz, marginal zone; vz, ventricular zone.

**Supplementary Figure S2.** The growth of the dorsal root ganglia (drg) is dependent on *Cux2* function. (A-C) Immunohistochemistry of NeuN in the drg of E11.5 wild type (A), *Cux2*<sup>neo/neo</sup> mutant (B), and *Nestin-Cux2-ires-EGFP* transgenic (C) embryos. (D-F) Immunohistochemistry of  $P27^{Kip1}$  in wild type (D), *Cux2* mutant (E) and transgenic (F) drg. (G-I) Immunohistochemistry of NeuroD showing greatly reduced staining in *Cux2* mutant (H), and enhanced staining in *Cux2* transgenics (I) relative to controls (G). All three post-mitotic neuronal markers show robust expression in *Cux2* mutants and transgenics, but the drg is smaller in the mutants and larger in the transgenics.

**Supplementary Figure S3.** Modulation of *Cux2* protein expression in gain-of-function and loss-of-function experiments in the chick and mouse embryonic spinal cord. (A-C) Electroporation of HH12 chick neural tubes *in ovo* with *Cux2-IRES-nucEGFP* bicistronic vector (A) and analysis of *Cux2* expression using a mouse-specific polyclonal antibody 48 hours later (B) reveals GFP-positive cells express m*Cux2* protein (C). (D-F) *Cux2* protein expression in a *Nestin-Cux2-ires-EGFP* transgenic neural tube at E11.5. (D) High GFP expression co-labeling with ectopic *Cux2* protein expression (E, F) in the vz. (G-H) *Cux2* protein levels in the spinal cord at the forelimb level of control wild type (G) and *Cux2*<sup>neo/neo</sup> mutant (H) embryos at E10.5. (H) The *Cux2* mutation is hypomorphic and leads to a near complete loss of *Cux2* expression in the ventral spinal cord at E10.5. Abbreviations: fp, floorplate.

**Supplementary Figure S4.** Dependence of expression of  $P27^{Kip1}$  and NeuroD on *Cux2* function in the developing spinal cord. (A-B)  $P27^{Kip1}$  (red) and NeuroD (green) immunohistochemistry on E9.5 trunk-level neural tubes from littermate control (A) and *Cux2*<sup>neo/neo</sup> mutants (B).  $P27^{Kip1}$  is

localized in the maturing populations in the ventral-lateral neural tube, while NeuroD is localized in neuroblasts at lateral half of the vz. The occasional nuclei is positive for both P27<sup>Kip1</sup> and NeuroD (arrow), but most expression remains mutually exclusion. (B) *Cux2* mutants showed a strong reduction of P27<sup>Kip1</sup> levels at E9.5 and a less severe loss of NeuroD-positive nuclei at E9.5. (C-D) P27<sup>Kip1</sup> (red) and NeuroD (green) levels in forelimb bud level spinal cords at E10.5 in a littermate control (C) and a *Cux2<sup>neo/neo</sup>* mutant (D). At E10.5, P27<sup>Kip1</sup> and NeuroD levels are largely non-overlapping except for a 2-4 cell layer thick zone in the ventral half of the neural tube (arrow in C-D), which identifies the iz, and in the drg. (D) *Cux2* mutants show a loss of NeuroD expression in the neural tube at E10.5 (but not drg). P27<sup>Kip1</sup> levels were reduced in the mz of the medial neural tube, but enhanced in the mns, reflecting an increase in post-mitotic mns at the expense of in (Fig. 7).

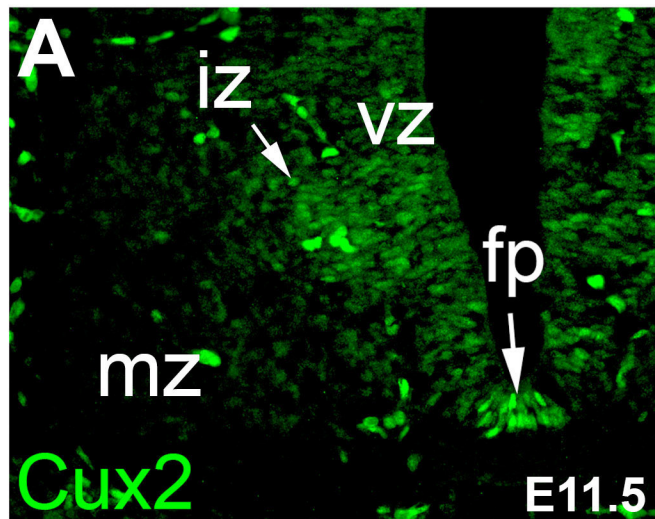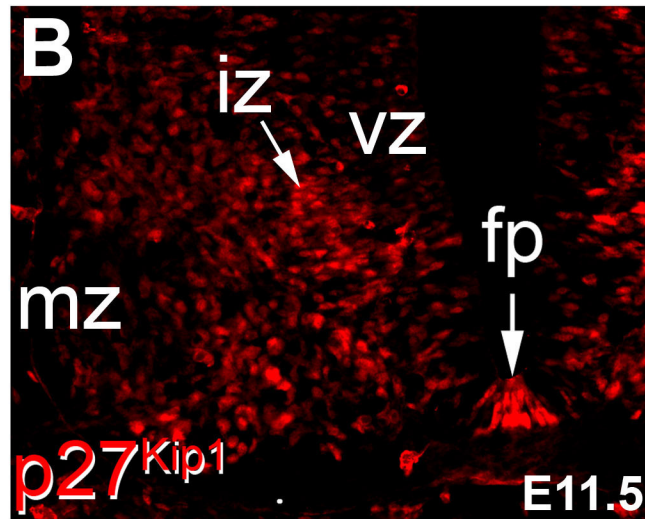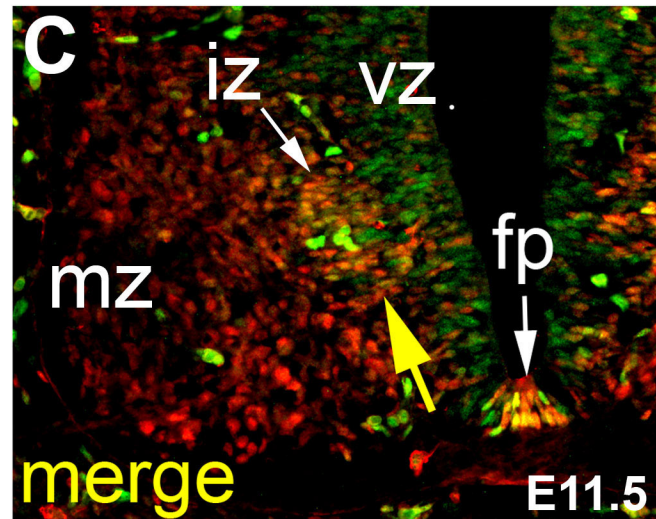

**NeuN**

**P27<sup>Kip1</sup>**

**NeuroD**

**Control**

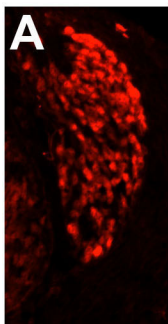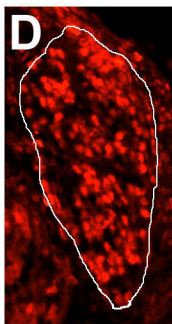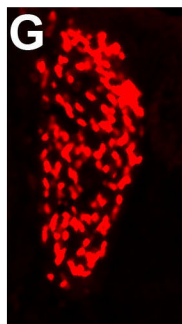

**CUX2<sup>neo/neo</sup>**

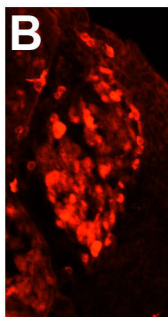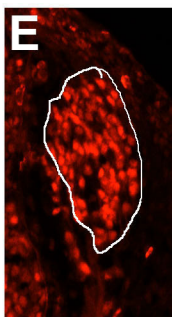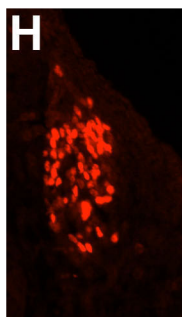

**CUX2 Tg**

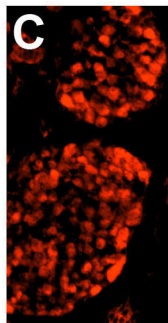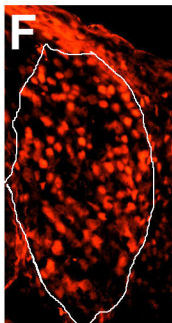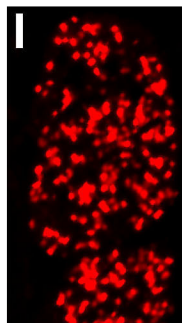

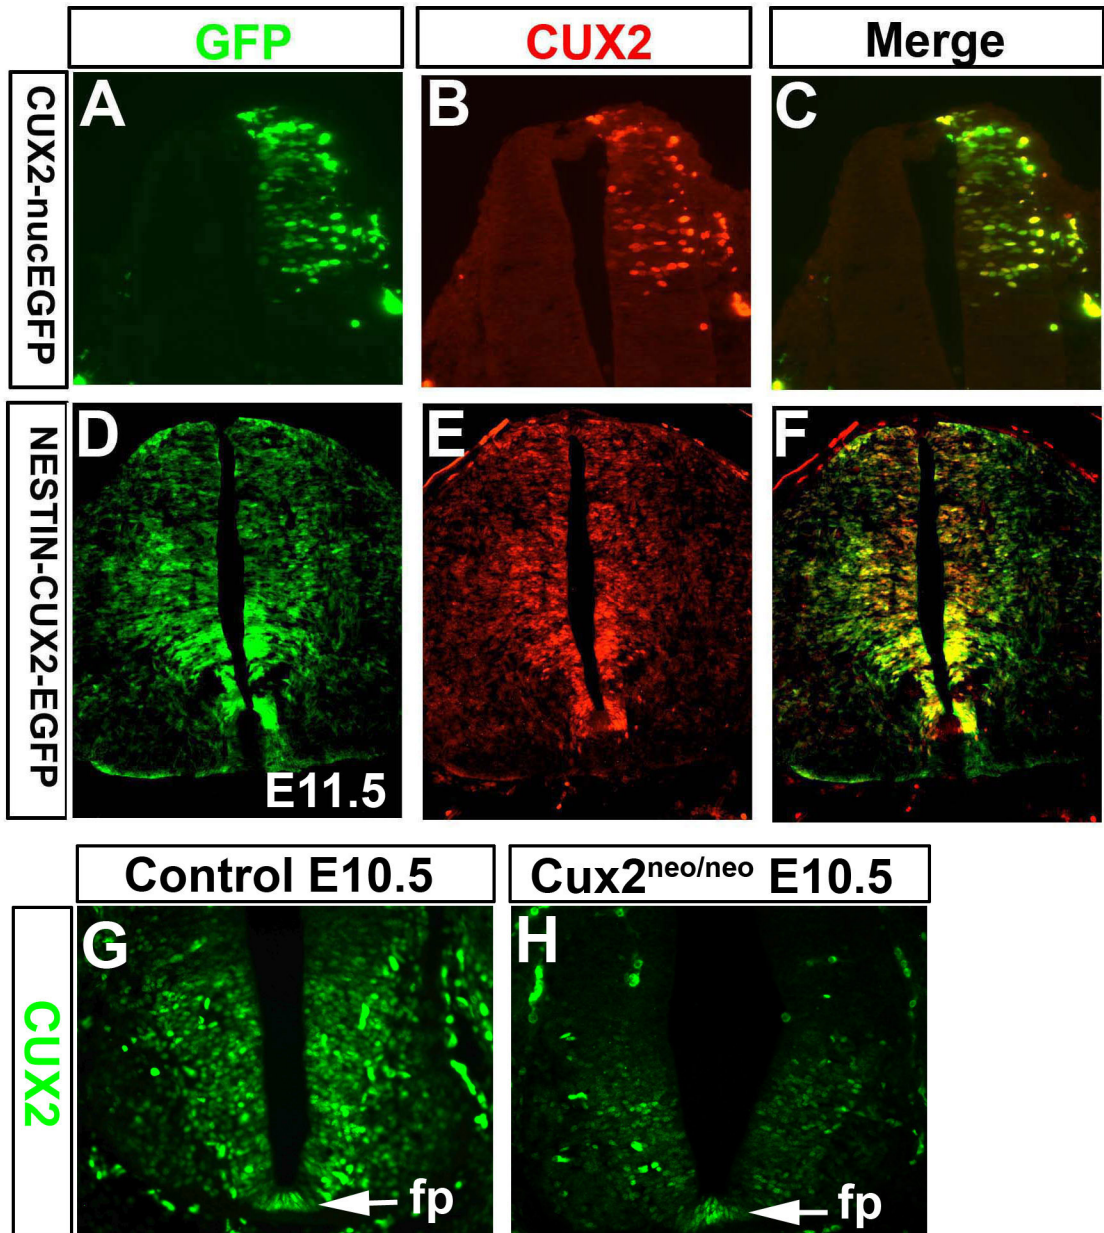

**E9.5**

**E10.5**

**Control**

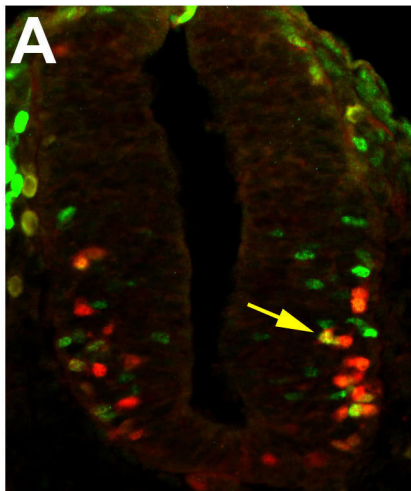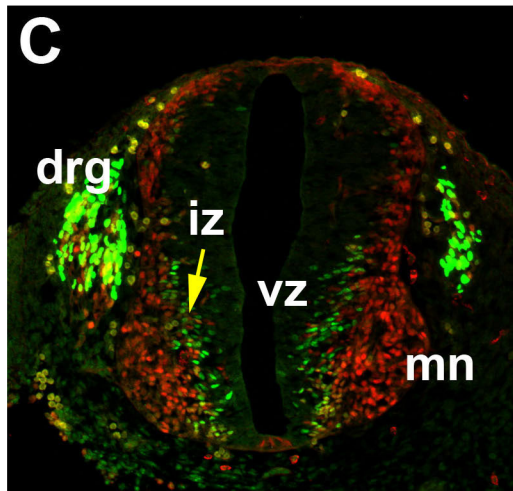

**CuX2<sup>neo/neo</sup>**

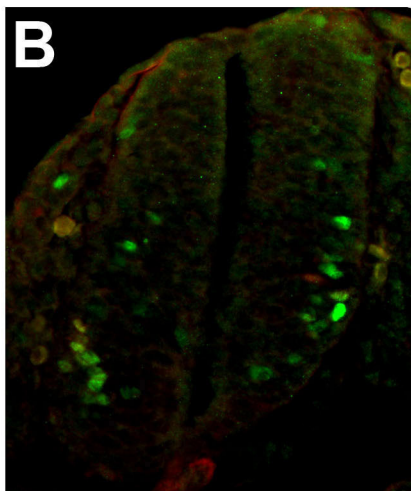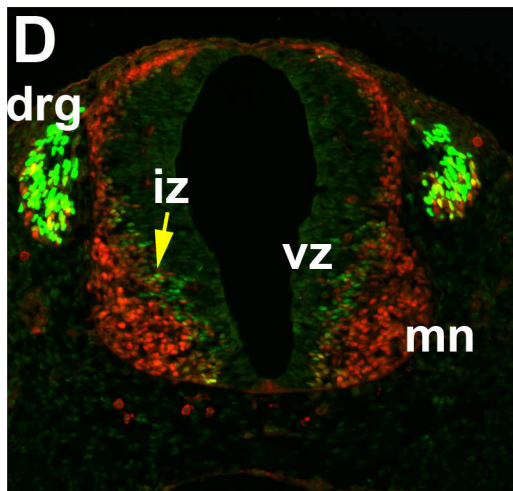

**p27<sup>Kip1</sup>**

**NeuroD**
